# Supplementary material for: Laboratory measurements of stomatal NO 2 deposition to nativeCalifornia trees and the role of forests in the NO x cycle
Source: Copernicus journal article supplement (doi:10.5194/acp-2020-240), 2020-03-25
Supplement: Supplementary file 1 [file acp-2020-240-supplement.pdf]

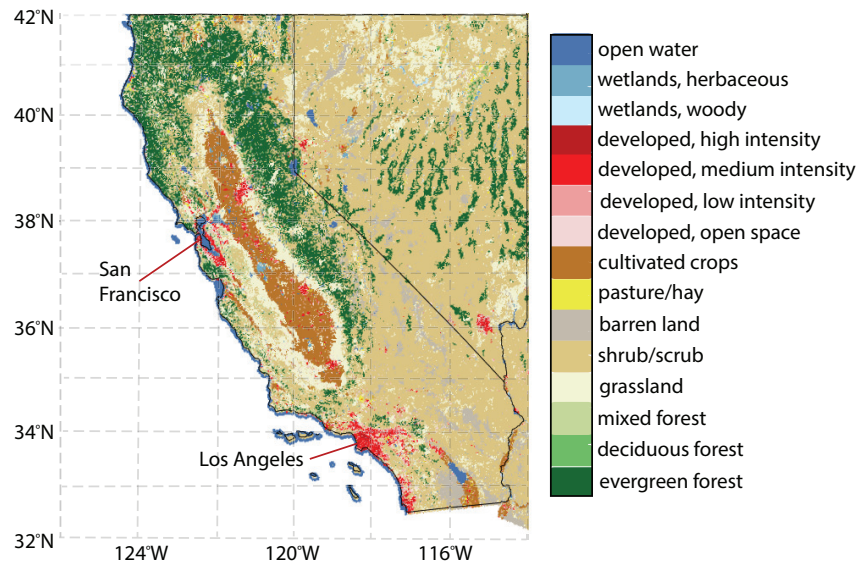

**Figure S1.** Land cover types for California from the National Land Cover Database (NLCD) 2016 for the continental United States. Resolution has been degraded from 30 m to 500 m for comparison to the Forest Inventory Analysis Database (2014) and MODIS leaf area index data. The locations of two major cities are indicated.

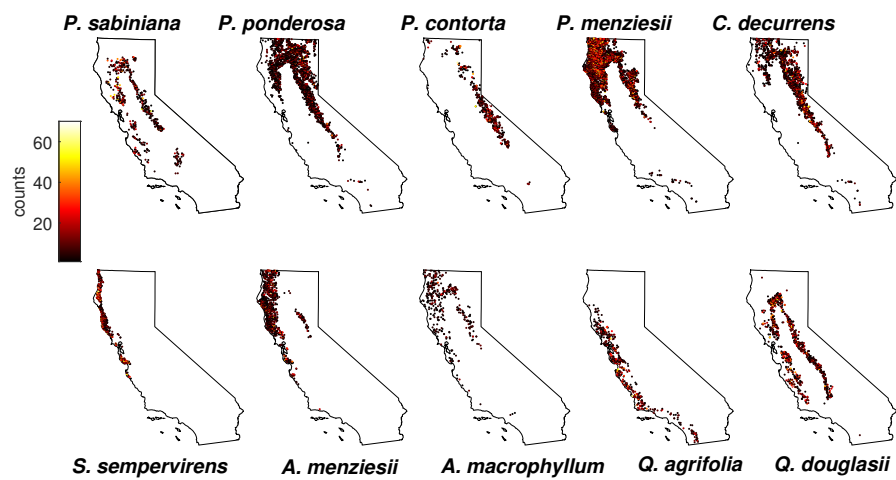

**Figure S2.** Counts of trees examined in this study from the Forest Inventory and Analysis Database

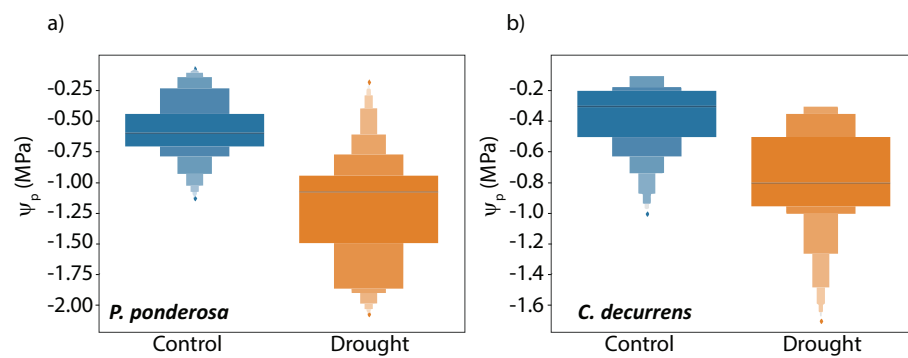

**Figure S3.** Box and whisker plots of water potentials for the control and drought groups of (a) *P. ponderosa* and (b) *C. decurrens*

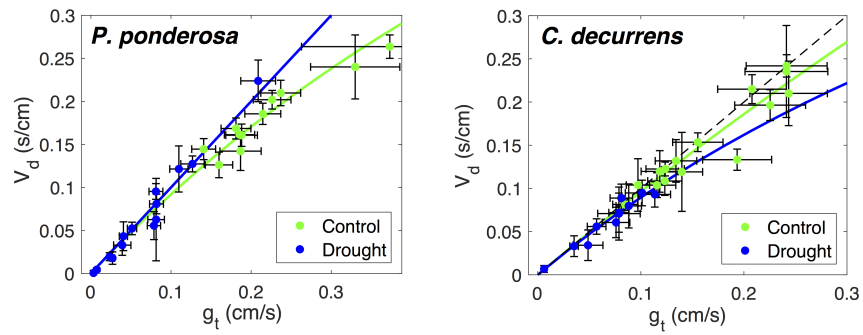

**Figure S4.** Plot of  $V_d$  versus  $g_t$  for (left) *P. ponderosa* and (right) *C. decurrens*. Blue markers and lines are data from drought-stressed trees and fits to the resistance model, respectively. Green markers and lines are data from control group trees and fits to the resistance model, respectively.

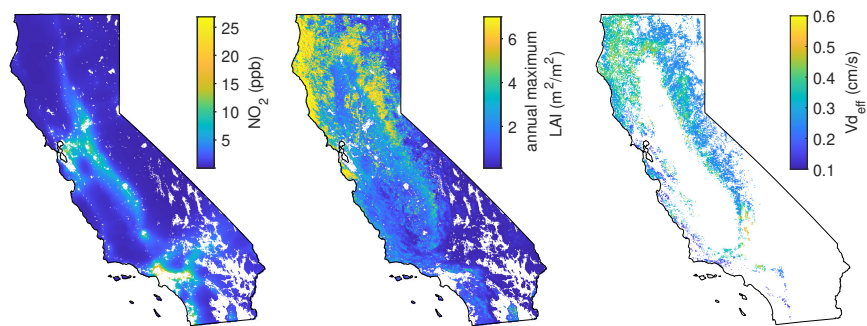

**Figure S5.** (left) Average midday NO<sub>2</sub> mixing ratios in the month of June 2014.(center) Maximum LAI during the year 2019 from MODIS. (right) Effective daytime state-wide deposition velocities of NO<sub>2</sub> to forests.
